Guiding caregivers through disclosure

1 **Guiding caregivers through disclosure: a qualitative**  
2 **investigation into caregivers' responses to a**  
3 **disclosure intervention for HIV-infected children in**  
4 **Soweto, South Africa**

5 **Short title: Guiding caregivers through disclosure**

6 Celeste Joyce<sup>\*†1</sup>, Candice Ramsammy<sup>†1</sup>, Lisa Galvin<sup>†14</sup>, Given Leshabane<sup>†1</sup>, Afaaf  
7 Liberty<sup>&1</sup>, Kennedy Otwombe<sup>&12</sup>, Janice Buckley<sup>&14</sup>, Minja Milovanovic<sup>&13</sup>, Avy Violari<sup>&1</sup>

8

9 <sup>1</sup>Perinatal Human Immunodeficiency Virus Research Unit, Faculty of Health Sciences, University of the  
10 Witwatersrand, Johannesburg, South Africa

11 <sup>2</sup>School of Public Health, Faculty of Health Sciences, University of the Witwatersrand, Johannesburg, South  
12 Africa

13 <sup>3</sup>African Potential Management Consultancy, Kyalami, South Africa

14 <sup>4</sup>Department of Psychiatry, University of the Witwatersrand, Johannesburg, South Africa

15

16 \* Corresponding author

17 Email : [joycec@phru.co.za](mailto:joycec@phru.co.za) / [celeste.joyce49@gmail.com](mailto:celeste.joyce49@gmail.com) (CJ)

18

19 <sup>†</sup>These authors contributed equally to this work

20 \*These authors contributed equally to this work

21

22

Guiding caregivers through disclosure

## 23 **Abstract**

24 Awareness of Human Immunodeficiency Virus (HIV) status improves health outcomes in  
25 HIV infected children, yet disclosure is often delayed by hesitant caregivers. This qualitative  
26 investigation explored how 30 caregivers responded to a HIV Disclosure study conducted  
27 between 2017 and 2020 at Chris Hani Baragwanath Academic Hospital, Soweto, South  
28 Africa. Caregivers were assisted in disclosing to their children, aged 7-13 years; followed by  
29 a sub-sample of caregivers interviewed to elaborate on findings. 1) Barriers to disclosure  
30 included caregivers being ill-equipped, fear of negative consequences and children  
31 considered lacking emotional or cognitive readiness. 2) Deflecting diagnosis and the need  
32 for medication motivated caregivers to disclosure. 3) Apprehension was evident during  
33 disclosure, however, overall disclosure was a positive experience with the support of the  
34 healthcare providers. These results highlight the significant role healthcare providers play in  
35 supporting caregivers through the disclosure process and how, in turn, this has a positive  
36 impact on the community as a whole.

37 Keywords: HIV; disclosure; stigma; children; caregivers

38

Guiding caregivers through disclosure

## 39 Introduction

40 The increase in Antiretroviral Therapy (ART) coverage led to a decline in HIV related  
41 deaths of children in Southern Africa, now making Human Immunodeficiency Virus (HIV) a  
42 chronic condition that requires comprehensive multidisciplinary care (1-10). Disclosing HIV  
43 status to perinatally-infected children remains a challenge despite evidence suggesting that  
44 it improves health and emotional outcomes (2, 3, 8-15). The SAdoH (16) suggests that  
45 partial disclosure takes place from 3 years to 9 years of age, and full disclosure is to take  
46 place from 10 years of age. Furthermore, this process should be followed-up. The WHO  
47 (4) suggests disclosing to school going children between 6 and 12 years of age (16). The  
48 World Health Organisation (WHO) and the South African National Department of Health  
49 (SAdoH) encourage a comprehensive approach to disclosure which ensures the child's  
50 physical, emotional, cognitive and social well-being is safeguarded by pre-disclosure not  
51 being completed in front of the child and children of school going age to be made aware of  
52 their caregivers' HIV status (4, 10, 11, 13, 16). Despite this, studies have shown that many  
53 children are unaware of their HIV status and that their caregivers are hesitant to disclose to  
54 them (17).

55 Disclosure has far reaching psychosocial implications (18). Caregivers and their HIV-  
56 infected children live as a part of a greater "whole". In accordance with Social Learning  
57 Theory, an individual is a member of his/her immediate family, extended family, culture,  
58 peer group, school and country. Not only do they influence their environment but they are  
59 directly influenced by the attitudes, perspectives and behaviours of others (19, 20).  
60 Caregiver attitudes towards HIV and disclosure are shaped by their personal experiences  
61 within the environment and the attitudes of those around them. This, in turn, shapes when  
62 and how disclosure is addressed in their own families (15, 20, 21). The literature has  
63 identified several barriers to disclosure including: social stigma; fear of discrimination; the  
64 impact on the child's emotional/psychological well-being; fear of the child's resentment;

## Guiding caregivers through disclosure

65 untimely disclosure of HIV status to others; exposure of the caregiver's "personal secrets";  
66 and caregiver's lack of knowledge on how and when to approach the disclosure questions  
67 (4, 13, 16, 17, 22-27). A recent study in Ghana (28) reported that caregivers lacked  
68 knowledge on how to disclose to their children, and that this poor knowledge was the main  
69 reason for delayed disclosure.

70 Few mothers were reported as being confident in their ability to disclose their status due to  
71 social stigma and the possibility of this stigma being passed onto their children (21).

72 Mothers more effective in disclosing their own statuses had better relationships with their  
73 children and this in turn improved the children's adjustment to the new knowledge of their  
74 mother's HIV status (29, 30). The VUKA study, which focused on pre-adolescent children  
75 awareness of their HIV status and family members, emphasised the importance of family  
76 involvement in mental health and health promotion interventions (31). Improvements in  
77 mental health, behaviour, HIV treatment knowledge and medication adherence, stigma and  
78 communication between the child and family members involved were noted (31).

79 Therefore, interventions aimed at assisting mothers disclose their child's HIV status to their  
80 children in a developmentally appropriate manner may also improve the mother's  
81 confidence in disclosing her own status.

82 We developed a study that guided caregivers through disclosure and explored their  
83 responses and interactions with their children before and after disclosure, and psychometric  
84 investigations of the impact of the disclosure process on the child's emotional state and  
85 adaptive behaviour (29). This 78-week study used disclosure material (30-32) to  
86 standardise the process across all participants, with both the caregivers and healthcare  
87 providers directly involved.

88 Here we present the caregivers' motivation for and response to each stage of the disclosure  
89 process. As the caregiver is at the core of the disclosure or non-disclosure issue, it is

Guiding caregivers through disclosure

90 important to understand their responses and perceptions and use these to shape future  
91 interventions.

## 92 **Methods**

### 93 **Study Setting and Participants**

94 The disclosure study was conducted between 2017 and 2020 at the Perinatal HIV  
95 Research Unit (PHRU), Chris Hani Baragwanath Academic Hospital, Soweto, South Africa.  
96 In keeping with both the SANDoH and WHO guidelines, children between the ages 7-13  
97 years, who had not been previously fully disclosed to were recruited along with their  
98 caregivers. Caregivers who attended PHRU clinics with their children were approached  
99 and children, who were not disclosed to or had received partial disclosure, and their  
100 caregivers were invited to participate in the study. During the first study session the  
101 caregivers were seen without the child participants and provided with information about the  
102 study process. The participating caregivers provided consent and following this the child  
103 participants were asked to provide assent (32). Thirty caregivers (i.e. the child's biological  
104 parent, legal guardian, foster parent, or another person that was responsible for the  
105 protection and promotion of the child's health, well-being and development) participated in  
106 the main study. Following the completion of the main study in 2020, a sub-sample of 15  
107 caregivers were invited to participate in the in-depth interviews where they shared their  
108 perspective of the disclosure program. These participants were purposely sampled to  
109 ensure the capture of a broad range of experiences.

110

### 111 **Study Procedures**

112 Study visits took place over 78 weeks, alternating between disclosure counselling sessions  
113 (completed week 72) and psychometric sessions (completed week 78), six weekly. The  
114 counselling sessions were led by healthcare providers, trained by the study Principle  
115 Investigator to use the "Right to Care Mini Flipster" (33) and the Joint United Nations

## Guiding caregivers through disclosure

116 Programme on HIV and AIDS (UNAIDS) (34) disclosure material. The initial pre-disclosure  
117 session was attended by the caregiver and the healthcare provider. During this session the  
118 caregiver was provided with more information and prepared for the disclosure process. The  
119 child and the caregiver participated together in the sessions that followed, facilitated by the  
120 healthcare provider. The healthcare provider made notes about the process during each  
121 session.

122

123 The initial sessions provided education about health, the immune system and the  
124 importance of medication adherence. The following sessions then assessed the child's  
125 knowledge about HIV and unclear concepts were revised. Based on the child's  
126 comprehension of these sessions, full disclosure was done by the caregiver with the  
127 support of the healthcare provider. Disclosure counselling sessions focused on children's  
128 feelings, made them aware of their support structures, and emphasised their own agency in  
129 their care. The process was individualised and flexible, allowing for additional visits,  
130 revisiting of topics, and accelerating or decelerating the process.

131

132 Following the completion of the main study (between nine and 15 months after full-  
133 disclosure), a subset of 15 caregivers were invited to participate in the in-depth, structured  
134 interviews aiming to better understand their experiences of the disclosure study. Purposeful  
135 sampling was used to ensure a wider age range, both female and male perspectives, as  
136 well as the perspectives of one caregiver who discontinued the study. Two participants  
137 discontinued the study, both never receiving full disclosure. One child's caregiver was no  
138 longer contactable after week 24. The other child's caregiver was unavailable after week  
139 48 but did consent to participating in the in-depth interviews.

140

141 Consent was obtained and in-depth interviews were conducted with 15 caregivers.

142 Interviewers were proficient in counselling and conducting interviews. They received

143 training on the interview schedule and were fluent in the spoken local languages of the

Guiding caregivers through disclosure

144 participants and English. As they were also familiar with the participants' culture, it was  
145 unlikely that cultural barriers would have skewed participant answers.

## 146 **Tools**

### 147 **Counselling Tools**

148 This study provided developmentally appropriate disclosure counselling using the "Right to  
149 Care" Disclosure Tool and the United States Agency for International Development (USAID)  
150 / U.S. President's Emergency Plan for AIDS Relief (PEPFAR) Disclosure booklets were  
151 used to standardise the disclosure process. The "Right to Care" Disclosure tool (33)  
152 consists of two developmentally appropriate flipster books: "Preparing Children for Pre-  
153 Disclosure Through Play" utilises stories, activities and songs to teach the younger child,  
154 below 12 years of age, about germs, healthy living and illness; and "Mini-flipster: Disclosure  
155 Tool for Adolescents Ages 12 & Up" explores the topics of Pre-Disclosure, Full-Disclosure  
156 and Post-Disclosure using the Socratic method of questioning. These tools were used  
157 together and developed to assist caregivers in the disclosure process.

### 158 **Disclosure Counselling Form (DCF)**

159 The DCFs were specifically developed by the research team for this study to record  
160 disclosure progression, provide progress notes and information regarding who  
161 accompanied the child. After each counselling session, the healthcare provider completed a  
162 DCF; recording their observations regarding the caregiver's and the dyads' interaction, and  
163 information provided by the caregiver during the session. The DCF was used to maintain  
164 structure and was also introduced to identify any psycho-social difficulties which could be  
165 addressed immediately.

166

167

Guiding caregivers through disclosure

## 168 **Data Collection**

### 169 **Healthcare provider's observations of the counselling sessions**

170

171 The healthcare providers (a social worker, counsellor or nurse) noted their observations on  
172 the DCF after each disclosure counselling session for each participant (approximately 6  
173 visits). This qualitative component relied on the healthcare providers' detailed observations  
174 of the caregivers' and the children's responses and behaviour during the counselling  
175 sessions. Any other relevant information that arose on the day was also recorded on this  
176 form.

177

178 The DCFs provided healthcare provider perspectives and observations throughout each  
179 stage of the disclosure process. There is little information in the literature regarding  
180 caregivers' reactions to the disclosure process and it was felt to be a valuable addition to  
181 the area of disclosure. As this could be considered to be subjective and from the  
182 perspective of the healthcare provider it was felt that it would be pertinent to include the in-  
183 depth interviews in this study as they explored specific themes more deeply providing a  
184 richness to this study.

185

### 186 **In-Depth Interviews**

187 An in-depth, structured interview guide was developed by the research team. Open-ended  
188 questions were used to elicit the perspectives of the caregivers on the disclosure process.

189 The interviews were developed and formulated with the purpose of understanding the  
190 challenges and concerns caregivers had around disclosing to their children before joining  
191 the disclosure study; the disclosure process itself; and to identify any concerns and  
192 parenting challenges that may arise in the future. These interviews were conducted by a  
193 registered counsellor and research psychologist. The registered counsellor did the



## Guiding caregivers through disclosure

194 psychometric assessments with the participants and had minimal contact with the  
195 caregivers. The research psychologist was not involved in the main study. The interviews  
196 took approximately 30-40 minutes to complete. Caregivers were interviewed primarily in  
197 English. However, questions were clarified and participants were able to respond in their  
198 language of preference (English, isiZulu or seSotho) and with their consent, audio  
199 recordings were made. The recordings were later transcribed and all transcriptions were  
200 translated into English for analysis.

## 201 **Data Analysis**

202 Information regarding barriers to disclosure, as well as observations relating to the  
203 caregiver and their response to the intervention from both the DCF's and in-depth interview  
204 transcriptions were analysed manually using content analysis. The analytic approach  
205 included the development of a code book, reviewing of the codes, coding and interpreting  
206 the data in order to describe, compare, categorise and conceptualise (35, 36).

207 Four analysts (a Clinical Psychologist, Psychiatrist, Research Psychologist and  
208 Registered Counsellor) independently reviewed and familiarised themselves with copies of  
209 the DCFs and interview transcripts. The analysts represented different cultural backgrounds  
210 and ages, and counselling fields and areas of expertise. Thus being experienced in  
211 interpreting subtle emotional nuances in responses and ensuring trustworthiness, credibility  
212 and reliability in the data interpretation. This assisted with improving the likelihood that  
213 cultural or training bias would unduly influence perceptions of results when coding data.  
214 Furthermore, none of the analysts were counsellors in the study, reducing the likelihood of  
215 bias when interpreting the data.

216 Initially, analysts working individually identified main ideas (meaning units) within the DCFs.  
217 These identified meaning units were discussed in the group and once agreed upon, the  
218 code book was developed. The data was then coded and codes of similar content or  
219 context were grouped together. These codes and categories were again compared across

Guiding caregivers through disclosure

220 analysts, merging common codes to formulate a single tabulation of categories.  
221 Discrepancies were discussed until consensus was reached. The categories were used to  
222 re-evaluate the data and to quantify the frequency of categories noted. Themes were then  
223 identified and the categories were grouped within the themes. The in-depth interview  
224 transcripts were treated independently, developing a separate code book and coding the in-  
225 depth interviews after the analysis of the DCFs had been completed. Similarities and  
226 differences between the two sets of data were identified and combined to provide a more  
227 complete understanding of the caregivers' reasons for not disclosing to their children before  
228 joining the program.

229 Caregiver demographics were analysed using descriptive statistics.

## 230 **Ethics/Protection of Human Subjects**

231 Ethical approval to conduct this study was obtained from the University of the  
232 Witwatersrand Human Research Ethics Committee (HREC, reference number 170107),  
233 Johannesburg. Informed consent was obtained from all caregivers and assent was obtained  
234 from all child participants in the Disclosure Study.

## 235 **Results**

### 236 **Study Population (See Table 1)**

237 Thirty HIV positive child and caregiver dyads were enrolled into the study The median age  
238 of the caregivers were 39.05 (IQR = 34-49). The majority of the caregivers (90%, 27/30)  
239 were biological parents and predominantly mothers (24 mothers vs 3 fathers), and the  
240 remaining 3 were grandmothers or aunts. However, during the study one father was unable  
241 to continue and the child was then accompanied by their mother; a second participant's  
242 mother was unable to complete the study and the father attended the final counselling  
243 session. In both cases this was due to employment commitments. Twenty-eight caregivers

Guiding caregivers through disclosure

244 were HIV-infected themselves and 27 were receiving ART. The majority of the adults were  
 245 unemployed (67%) and 83% a secondary level of education.

246 **Table 1: Caregiver Demographics**  
 247

|                                    |                   |            |
|------------------------------------|-------------------|------------|
| <b>Relationship to participant</b> | Mother (%)        | 23 (76.66) |
|                                    | Father (%)        | 4 (13.33)  |
|                                    | Other (%)         | 3 (10.0)   |
| <b>HIV Status</b>                  | Positive (%)      | 28 (93.33) |
|                                    | Negative (%)      | 2 (6.67)   |
| <b>Receiving ART</b>               | Yes (%)           | 27 (96.43) |
|                                    | No (%)            | 1 (3.57)   |
| <b>Education Level</b>             | Post Grade 12 (%) | 3 (10.0)   |
|                                    | Secondary (%)     | 1 (3.33)   |
|                                    | Secondary (%)     | 25 (85.33) |
|                                    | Primary (%)       | 1 (3.33)   |
|                                    | Unknown (%)       |            |
| <b>Employment Status</b>           | Employed (%)      | 10 (33.33) |
|                                    | Unemployed (%)    | 20 (66.67) |

248

## Guiding caregivers through disclosure

249 Of the 15 caregivers who participated in the in-depth interviews, the majority were mothers  
250 (13 mothers vs 2 fathers) with a median age of 38,08 years (IQR = 34-43). Thirteen of 15  
251 caregivers had fully disclosed to their children by the end of the study. One participant  
252 completed all study visits but due to their young age and insufficient concept  
253 comprehension, the participant did not receive full disclosure. Moreover, the remaining  
254 dyad discontinued the study prior to full disclosure.

255 Three central themes, related to the caregivers' experience of disclosure, emerged during  
256 analysis: their barriers towards disclosure; their reason for disclosing through the study; and  
257 the caregivers' response to disclosure.

258

## 259 **1. The caregivers' reservations to disclosure of the child's**

### 260 **HIV status (See Table 2)**

261 Caregivers were asked at the first disclosure counselling session what had prevented them  
262 from disclosing their child's HIV status to them. This open-ended question, recorded on the  
263 DCFs, was identified as a central theme during the content analysis. These reasons were  
264 further supported by the in-depth interviews. Three sub-themes were identified:

265 1.1) Caregiver practically ill-equipped to disclose

266 1.2) Fear

267 1.3) Lack of emotional readiness

268

269

270

271

272

273

Guiding caregivers through disclosure

274 **Table 2: Barriers to Disclosure taken from the Disclosure Counselling Forms**

| Sub-Theme                             | Code                                   | Examples from data                                                                                                                                                                                                                                                                                                                                                                                                                                 |
|---------------------------------------|----------------------------------------|----------------------------------------------------------------------------------------------------------------------------------------------------------------------------------------------------------------------------------------------------------------------------------------------------------------------------------------------------------------------------------------------------------------------------------------------------|
| i. Caregiver practically ill-equipped | a. Lack of Confidence in HIV Knowledge | <p>“father said he was not sure what to say to the child; not sure what information to give” (001, Screening Visit)</p> <p>"She didn't know what to say to the child and scared that she won't be able to answer the questions" (013, Screening Visit)</p>                                                                                                                                                                                         |
|                                       | b. Child not old enough for disclosure | <p>“The mom felt she was too young, her daughter” (002, Screening Visit)</p>                                                                                                                                                                                                                                                                                                                                                                       |
| ii. a. Fear                           | Stigma                                 | <p>“There are family dynamics that she still fears about her HIV status. It looks like she has never really come to terms with her HIV status (004, Week 24 Visit)</p> <p>“mom talked a lot about stigma and the fact that she’s never disclosed to anyone except her partner who rejected her afterwards” (015, Screening Visit)</p> <p>“Her child can’t keep a secret, so she is afraid that she will tell everybody” (028, Screening Visit)</p> |
|                                       | Fear in itself                         | <p>“Mom feels the child will run way” (004, Week 12 Visit)</p> <p>“Caregiver expressed her fears and asked a lot of questions” (007, Screening</p>                                                                                                                                                                                                                                                                                                 |

Guiding caregivers through disclosure

|                                                 |                         |                                                                                                                                                                                                                                                                          |
|-------------------------------------------------|-------------------------|--------------------------------------------------------------------------------------------------------------------------------------------------------------------------------------------------------------------------------------------------------------------------|
|                                                 |                         | Visit)                                                                                                                                                                                                                                                                   |
|                                                 | Rejection               | “mom feared rejection” (003, Screening Visit)                                                                                                                                                                                                                            |
| ii. b. Caregiver<br>Lack of Emotional readiness | Not emotionally ready   | “Mom has never been supported about her own status so as a result she’s not really comfortable talking about HIV” (027, Screening Visit)                                                                                                                                 |
|                                                 | Guilt                   | “mom didn’t want to burden her son with her guilt and weight of being HIV+” (007, Week 12 Visit)<br><br>“mom is burdened with the guilt that she infected the child” (015, Screening Visit)<br><br>“she felt guilt, of all her children, why him” (031, Screening Visit) |
|                                                 | Avoidance               | “The dad seemed not to be free talking about HIV” (026, Screening Visit)<br><br>“Mom has never been supported about her own status so as a result she’s not really comfortable talking about HIV” (027, Screening Visit)                                                 |
|                                                 | Anxiety                 | “mom seemed nervous about the child knowing her status” (004, Week 12 Visit)                                                                                                                                                                                             |
|                                                 | Only found out Recently | “The mom found out last year when the child was hospitalised about her status. The child since started ARVs and she’s curious about why she is taking meds                                                                                                               |

## Guiding caregivers through disclosure

|  |  |                                                                                                                                                                                      |
|--|--|--------------------------------------------------------------------------------------------------------------------------------------------------------------------------------------|
|  |  | (016, Screening Visit)<br>"The dad just found out last year November about his son's status, as he was admitted in hospital. The child started ARV treatment" (022, Screening Visit) |
|--|--|--------------------------------------------------------------------------------------------------------------------------------------------------------------------------------------|

275

276

### 277 **1.1 Caregiver practically ill-equipped for disclosure**

278 The most common reason for not disclosing (43%, 13/30 caregivers) was that they felt that  
279 the children were still too young and that younger children would not be able to understand  
280 HIV/AIDS. There was, however, no reference to a particular age at which the child would be  
281 "ready" or why they thought the child wouldn't understand the information. Although the  
282 caregivers indicated that the participants were too young to undergo disclosure, this was  
283 better associated with the caregivers' own insecurities and inadequacies in their ability to  
284 disclose to their children. During the interviews this was explored and caregivers gave age  
285 ranges between 11-18 years as an appropriate age for disclosure as they would have a  
286 better understanding of seriousness of HIV and the implications for their lives.

287 Almost three quarters (70%, 24/30) of caregivers felt ill-equipped to disclose, citing  
288 challenges in communicating with their children about their illness. Eleven caregivers (37%,  
289 11/30) reported a lack of confidence in their own HIV knowledge restricted their ability to  
290 disclose to their children. Some caregivers did not know what and how much information to  
291 share, and how much detail to include about the illness. Others were concerned that they  
292 were uncertain of their ability to respond and/or handle questions that would arise after  
293 disclosure. During the in-depth interviews, four of the 15 caregivers elaborated on this lack  
294 of confidence in their HIV knowledge.

295

Guiding caregivers through disclosure

296 *“My problem was that I was not going to be able to face the questions that would arise and*  
297 *did not have a plan as to how I go about starting the conversation with him” (caregiver of*  
298 *participant 018, interview).*

299

## 300 **1.2 Fear**

301 Fear was a common reason for not disclosing in 40% of the caregivers (12/30). This was  
302 confirmed during the in-depth interviews. Fear of stigma, rejection from their child and fear  
303 in itself were equally reported.

304 Ten caregivers expressed fear of stigma. Five (50%, 5/10) had not disclosed prior to the  
305 study because they were concerned about how others would react to the child disclosing  
306 their status; another two (20%, 2/10) expressed concerns about how family would react to  
307 finding out that the child was HIV positive; and three (30%, 3/10) were afraid of the child  
308 being unable to maintain confidentiality (“keep the secret”) about their status.

309 Fear of social stigma was also evident during the in-depth interviews where one of the  
310 caregivers stated:

311 *“We were scared and afraid that he would go about talking about it in the neighbourhood.*  
312 *Scared of being stigmatised” (caregiver of participant 028, interview).*

313 Furthermore, five caregivers (17%, 5/30) cited a fear of rejection from their children after  
314 disclosure. During the in-depth interviews, this fear of rejection was not only limited to the  
315 caregiver being rejected by the child but also to the child being rejected by other family  
316 members

317 *“I was scared to tell him he is HIV+ because it is only him that is infected ... I thought that if*  
318 *the other two knew he was HIV they might distance themselves from him and not allow him*  
319 *to be part of them” (caregiver of participant 031, interview).*



## Guiding caregivers through disclosure

320 Generalised fear was observed in three caregivers (10%, 3/30), related to how the child  
321 would react to being disclosed to (i.e. running away or responding negatively to the news).  
322 Two other caregivers (7%, 2/30) were afraid to broach the subject of HIV and disclosure.  
323 This was reiterated during the in-depth interviews where the caregivers spoke of being  
324 afraid to broach the subject and one expressed concern that disclosing to the child would  
325 lead to worse consequences.

326 *“How would I explain to him what is HIV? And what if he gets angry and kills himself”*  
327 *(caregiver of participant 005, Interview).*

### 328 **1.3 Lack of Emotional Readiness**

329 Guilt was the most common emotion preventing disclosure with caregivers describing  
330 feelings of guilt at having infected their children with HIV. This was evident during the in-  
331 depth interviews where some of the caregivers expressed their guilt and/or shame around  
332 their children’s status:

333 *“Because I feel ashamed when I look at her always neh. And I was having that thought how*  
334 *am I going to tell her” (caregiver of participant 006, Interview)*

335 However, anxiety was only overtly observed in one caregiver (3%, 1/30) who appeared  
336 nervous about the child learning of her status.

337 Almost 10% (9/30) of caregivers also felt the need to be emotionally prepared before  
338 disclosing to their children. This ranged from one caregiver not feeling “ready” to broach  
339 disclosure to another who was still struggling with her own HIV diagnosis. Two other  
340 caregivers had only recently discovered their child’s HIV status when their child had been  
341 admitted to hospital for illness. These caregivers were not emotionally prepared to address  
342 disclosure with their children and later discontinued the study.

Guiding caregivers through disclosure

## 343 **2. Reasons why caregivers chose to disclose through the** 344 **intervention**

345 During the in-depth interviews the caregivers were asked what prompted them to participate  
346 in the Disclosure study. Two sub-themes were evident when analysing their answers:

347 2.1 To explain why the child was taking medication

348 2.2 The need for assistance in disclosing and normalising the situation

### 349 **2.1 Explanations for why the child was taking medication**

350 All participants in the disclosure study were on ARV treatment with the majority of the  
351 participants having been on treatment for most of their lives. Out of the 15 caregivers  
352 interviewed, nine (60%) expressed that their children were asking why they were taking  
353 medication.

354 *“The reason I brought him to disclosure is that maybe he will get information about why he*  
355 *has to drink the pills and further tell him his HIV status” (caregiver of participant 005,*  
356 *interview)*

357 The lack of disclosure had led to caregivers misleading their children about the necessity  
358 for the medication. Children were told that they were taking medication for ailments such  
359 as Asthma, Bronchopneumonia, TB, Bronchitis, Tonsillitis and for the flu. Additional  
360 reasons included that they were health supplements and vitamins which would keep them  
361 from falling down often, getting injured, and to help them grow bigger and/or stronger. The  
362 caregivers also commented that at times their children would not adhere to the medicine  
363 regime and “lie” about having taken their medication

364 *“she would give me stories/excuses when she was supposed to take her medication”*  
365 *(caregiver of participant 018, interview).*

Guiding caregivers through disclosure

## 366 **2.2 The need for assistance in disclosing and normalising the** 367 **situation**

368 Seven of the 15 (47%) caregivers interviewed expressed a need for assistance from more  
369 knowledgeable sources when disclosing to their children, as they, in particular the  
370 healthcare providers, would provide the necessary objectivity, support, information and  
371 have the ability to normalise the situation.

372 *"I also needed some external help, if I can say so, to make him feel there is nothing wrong*  
373 *with whatever is happening or whatever is going on ... I needed someone to assure him,*  
374 *besides me, to assure him that all's good and that he's good." (caregiver of participant 001,*  
375 *interview)*

376 By normalising the situation, the healthcare providers are able to put into words the fears  
377 and apprehensions the caregivers are experiencing. Through their understanding, support  
378 and ability to educate the caregivers, the caregivers are able to develop the ability to  
379 address disclosure with their children. Furthermore, the acceptance of status by both the  
380 healthcare providers and caregivers, as well as the knowledge that being HIV positive is not  
381 a death sentence or something to be ashamed about, assists the child in accepting their  
382 status.

## 383 **3. The caregivers' response to the Disclosure program** 384 **(See Table 3)**

385 Throughout the study, the healthcare providers recorded their observations of how the  
386 caregivers responded to the various stages of the disclosure program on the DCFs.

### 387 **Table 3: Caregiver's observed reaction to the Disclosure Process taken from** 388 **the Disclosure Counselling Forms**

Guiding caregivers through disclosure

| Subtheme                     | Code                      | Examples from Data                                                                                                                                                                                                                                                                                     |
|------------------------------|---------------------------|--------------------------------------------------------------------------------------------------------------------------------------------------------------------------------------------------------------------------------------------------------------------------------------------------------|
| i. Pre- Disclosure           | <b>Negative Responses</b> | <p>“Father was told not to panic, and that he will be supported by the staff” (001, Week 24 Visit)</p> <p>“Mom seemed nervous about the child knowing her status...Mom feels that the child will run away” (004, Week 12 Visit)</p>                                                                    |
|                              | a. Anxiety                |                                                                                                                                                                                                                                                                                                        |
|                              | b. Hesitancy/ Avoidance   | <p>“The father said he is not ready to let the child know about HIV because he is not sure the child will comprehend the information” (001, Week 24 Visit)</p> <p>“Mom has been avoiding any subject that related to HIV (002, Week 48 Visit)</p>                                                      |
|                              | <b>Positive Responses</b> | <p>“mom says she’s seen a big improvement in her child” (017, Week 12 Visit)</p> <p>“Mom is happy with progress” (005, Week 12 Visit)</p> <p>“Father is happy about the process and promised to support the child” (001, Screening Visit)</p> <p>“Mom relieved about the process” (014, Screening)</p> |
|                              | a. Happy                  |                                                                                                                                                                                                                                                                                                        |
| b. Satisfaction with program |                           |                                                                                                                                                                                                                                                                                                        |
| c. Relief                    |                           |                                                                                                                                                                                                                                                                                                        |
| ii. Full Disclosure          | <b>Negative Response</b>  | “Granny was a bit anxious of her                                                                                                                                                                                                                                                                       |

Guiding caregivers through disclosure

|                       |                                                          |                                                                                                                                                                                                                               |
|-----------------------|----------------------------------------------------------|-------------------------------------------------------------------------------------------------------------------------------------------------------------------------------------------------------------------------------|
|                       | a. Anxiety/ Uneasy                                       | grandson's reaction and was also assured" (003, Week 48 Visit)<br><br>"mom was the one feeling uneasy specially after disclosing, she kept on doing disturbing mannerisms" (010, Week 48 Visit)                               |
|                       | b. Counter-productive assurance                          | "Mom was in the session very anxious and at the same time trying to comfort her but a bit destructive" (015, Week 48 Visit)                                                                                                   |
|                       | <b>Positive Response</b><br>a. Encouragement/Reassurance | "The mom really helped by encouraging her to talk" (011, Week 48 Visit)<br><br>"Tried to reassure him" (028, Week 48 Visit)                                                                                                   |
| iii. Post -Disclosure | <b>Negative Response</b><br>a. Emotionally distant       | "Father seemed distant" (013, Week 72 Visit)<br><br>"No conversation after full disclosure as parents are not staying with the child...No one took the time to sit with her and talk, especially the mom (026, Week 72 Visit) |
|                       | <b>Positive</b><br>a. Satisfied/ Happy                   | "Mom very happy with her school progress and even at home she's coping very well" (006, Week 72 Visit)                                                                                                                        |

## Guiding caregivers through disclosure

|  |                                |                                                                                                                                        |
|--|--------------------------------|----------------------------------------------------------------------------------------------------------------------------------------|
|  | b. Prompted further disclosure | “disclosure study helped her that she even decided to disclose to her older daughter cos (sic) she is HIV+ve too” (008, Week 72 Visit) |
|  | c. Relief                      | “mom was very anxious but she seemed <u>relieved</u> about her daughter after disclosure” (29, w48)                                    |

389

### 390 **Caregivers’ response Pre-Disclosure**

391 The response was perceived by healthcare providers to be both negative and positive with  
392 six caregivers (6/30, 20%) reported to be anxious, and five (5/30, 17%) being hesitant. On  
393 the other hand, five (5/30, 17%) expressed their happiness and appreciation to be part of  
394 the process.

### 395 **Caregivers response during Full Disclosure**

396 Negative responses were more evident than positive ones with the most common during  
397 this period being anxiety or unease (6/30, 20%). One caregiver’s anxiety during this time  
398 appeared to be counter-productive during the session, having a negative impact, instead of  
399 being calming and encouraging, the caregiver’s own anxiety resulted in deflecting attention  
400 from the participant at a crucial stage of disclosure to that of the caregiver.

401 However, some caregivers responded positively, encouraging and reassuring the child.

### 402 **Caregivers response Post-Disclosure**

403 At their post-disclosure visits, the caregivers had more positive (23%, 7/30) than negative  
404 responses (7%, 2/30), including satisfaction with their child’s progress. Others reported

## Guiding caregivers through disclosure

405 relief that their children knew their status. One felt that the disclosure study was so helpful  
406 that she even decided to disclose to her other child. Other observations made included  
407 improved dyad relationships, understanding the importance of being responsible for the  
408 administration of medication and good nutrition. However, two caregivers (7%, 2/30)  
409 responded negatively, and were observed as being emotionally distant.

## 410 **Discussion**

411 This qualitative investigation described the response of caregivers to the disclosure process  
412 aimed to assist them to disclose to their children's HIV+ status to them. Caregivers  
413 indicated that, prior to the study, they were reluctant to disclose to their children due to  
414 feeling ill-equipped to address the subject, being afraid and not being emotionally ready.  
415 They were motivated to disclose during this study as medication adherence was becoming  
416 problematic and they felt more comfortable with a healthcare provider present to assist with  
417 disclosure and normalise the situation. Initially they presented as being both anxious and  
418 grateful for the study. As the study progressed to full disclosure, many caregivers reacted  
419 negatively with anxiety to the intervention. However, following full disclosure feelings of  
420 relief and satisfaction with their child's progress was noted. This study also empowered a  
421 caregiver post-disclosure to independently disclose to her other child.

422 The caregiver's attitudes towards HIV and HIV disclosure is shaped by their personal  
423 experiences within the environment and the attitudes of those around them, as surmised by  
424 social learning theory (27). This disclosure study allowed disclosure to occur in a contained  
425 environment under the nurturing and non-judgemental guidance of the healthcare provider.  
426 Healthcare providers modelled positive behaviours for both caregiver and child during  
427 disclosure, and guided the caregiver on how to disclose. This made the process less  
428 stigmatising, positive and open, and provided a safe space where trust was fostered.  
429 Perceptions that HIV should not be stigmatising and allowing caregivers space to gain

## Guiding caregivers through disclosure

430 confidence in their ability to manage disclosing to their children and also in talking about  
431 their own status were reinforced.

432 The healthcare providers' ability to model healthy attitudes towards HIV and reduce  
433 negative emotions around disclosure, taught caregivers how to model the same behaviour  
434 for their children. This was especially evident in reflections from the caregivers where they  
435 dealt with their own HIV status during the disclosure study. By applying social learning  
436 theory, addressing the negative attitudes and stigmatization held within the wider  
437 community the study could shift the caregiver's experience of their own disclosure, reduce  
438 their anxiety and shame, and thus encourage more positive responses towards HIV self-  
439 disclosure. Through this, children may learn not to fear the disease, and have less adverse  
440 responses when disclosed to (12, 39, 46).

441 Initially, many caregivers responded to the intervention with anxiety, concern that their  
442 children were too young for disclosure, fear of negative consequences, as well as a lack of  
443 confidence in their own knowledge of HIV. This is consistent with other studies (10, 23, 26,  
444 41-45), indicating a need to address the stigma still highly present in our communities that  
445 contributes to secrecy around HIV. The fear of stigma from others also leads to self-  
446 stigmatisation, making it difficult for caregivers to accept their own diagnosis, and in turn  
447 projecting that unacceptance and stigma onto their child (13, 23, 39). This emphasises the  
448 need to equip healthcare providers to prepare and support caregivers throughout the  
449 disclosure process (27, 28, 43, 44, 47).

450 Previous research cited the caregivers' fear of disclosure having a negative impact on  
451 children's mental health but once disclosed to, the child was described as having lower  
452 anxiety and depression scores (26, 29, 40, 41-46). Early research reflected the fear of  
453 dying, and the portrayal of HIV-related deaths in the media was seen as another barrier to  
454 disclosure (41, 42). However, medical advancements and wider accessibility to ART may  
455 explain why this was not seen in our study. Importantly, two caregivers only discovered



## Guiding caregivers through disclosure

456 their child's status when the child was admitted to hospital for illness prior to joining the  
457 PHRU Wellness Clinic shortly before the study began. Consequently, both discontinued the  
458 study. This emphasises the need to ensure that caregivers feel supported and have  
459 accepted their own diagnosis and that of their child before disclosure. It also stresses a  
460 need for community education to reduce the spread of misinformation (13, 23, 39).

461 Non-adherence was the most prominent motivation to disclose in this study. Prior to  
462 disclosure, caregivers would mislead their children about the need for medication and  
463 deflect diagnosis to maintain adherence. However, caregivers noted that these strategies  
464 were losing effect and realised the need to disclose. Improved adherence was noted in  
465 several cases in our study. This with subsequent improvement in the child's wellbeing is in  
466 keeping with previous findings (13, 39, 47-50).

467 The need to normalise the child's HIV status was another prominent motivating factor for  
468 disclosure. This concurs with studies that reported that children deserve the right to know  
469 their status (47, 49). Caregivers in this study stated that they required the assistance of the  
470 more knowledgeable healthcare providers in disclosing and normalising HIV to their  
471 children. Similarly, other studies have found that most caregivers either preferred  
472 healthcare providers to disclose to their children, or required support from knowledgeable  
473 healthcare providers during disclosure (4, 47, 50). This emphasises the significant role  
474 healthcare providers play in the disclosure process and is in accordance with other  
475 literature and recommendations made by WHO.

476 Given the barriers experienced by the caregivers prior to disclosure, an initial negative  
477 response early in the disclosure process is not surprising. However, this sample of  
478 caregivers had an almost equal number of negative and positive responses towards  
479 disclosure initially. Post-disclosure found caregivers responding positively with satisfaction  
480 and relief to the process. A sense of improved confidence, HIV knowledge and caregiver-  
481 child relationships were observed. Healthcare providers played a critical role in supporting

## Guiding caregivers through disclosure

482 the caregiver during disclosure, alleviating their anxieties and building their confidence.  
483 Furthermore, improved communication also assisted caregivers in becoming more  
484 comfortable talking about their own HIV status. Similarly, another HIV intervention study  
485 reported caregivers felt that the program made equipped them better to answer questions  
486 and to handle disclosure (51, 52).

487 Limitations in this study included: 1) positive responses may reflect a sampling bias, as  
488 these caregivers were willing and open to participate in both the main study and the sub-  
489 study. This could indicate a comfort and familiarity with the HIV clinic staff as most had  
490 been attending the clinic prior to the study. 2) Caregivers may have also provided socially  
491 desirable answers during the in-depth interviews due to familiarity with the interviewers from  
492 interactions during regular clinic visits. 3) A wide range of emotional responses were also  
493 not captured in the DCFs, a limitation when using observational reports. However, the in-  
494 depth interviews that followed the disclosure program, did allow the researchers to gain  
495 further insight into some of the DCF observations. 4) This study has a predominant female  
496 perspective as most of the experiences and views were of female caregivers, and the  
497 DCF's were completed and analysed by a female team. However, in many interventions  
498 mothers are often the caregivers accompanying the child to the HIV interventions.  
499 Regardless of these limitations, this study has added to the very limited literature regarding  
500 caregiver's reactions during disclosure especially in South Africa where the largest  
501 population of people living with HIV reside.

502 Understanding the reservations and motivations caregivers have towards disclosure can  
503 make an impact in shaping future HIV disclosure interventions. Many disclosure studies  
504 have focused on the children not their caregivers. This study suggests the need to design  
505 interventions with support structures in place that assist the caregiver through the  
506 disclosure process during and following full disclosure to the child. This study also  
507 highlighted the need for caregivers to be educated on the benefits of disclosure and risks of  
508 non-disclosure. Moreover, positive behaviours and attitudes modelled by healthcare

Guiding caregivers through disclosure

509 providers play a significant role in assuring the caregiver during disclosure, and can start  
510 alleviating the effects of stigma from the community.

## 511 **References**

- 512 1. UNAIDS. UNAIDS Data. In: AIDS DoHa, editor. Geneva, UNAIDS 2019:  
513 Joint United Nations; 2019. Available at:  
514 [https://www.unaids.org/sites/default/files/media\\_asset/2019-UNAIDS-](https://www.unaids.org/sites/default/files/media_asset/2019-UNAIDS-data_en.pdf)  
515 [data\\_en.pdf](https://www.unaids.org/sites/default/files/media_asset/2019-UNAIDS-data_en.pdf). Accessed 15 January 2020
- 516 2. Murnane, P. M., Sigamoney, S. L., Pinillos, F., *et al.* Extent of disclosure: what  
517 perinatally HIV-infected children have been told about their own HIV status. *AIDS*  
518 *Care*, 2017, 29(3), 378-386. doi:10.1080/09540121.2016.1224310
- 519 3. Nichols, J., Steinmetz, A., & Paintsil, E. Impact of HIV-Status Disclosure on  
520 Adherence to Antiretroviral Therapy Among HIV-Infected Children in Resource-  
521 Limited Settings: A Systematic Review. *AIDS Behav*, 2017, 21(1), 59-69.  
522 doi:10.1007/s10461-016-1481-z
- 523 4. Organisation, World Health. World Health Organisation: Guideline on HIV disclosure  
524 counselling for children up to 12 years of age; 2011. Retrieved from  
525 [http://whqlibdoc.who.int/publications/2011/9789241502863\\_eng.pdf](http://whqlibdoc.who.int/publications/2011/9789241502863_eng.pdf) Accessed 20  
526 July 2018
- 527 5. Wright, S., Amzel, A., Ikoru, N., *et al.* Talking to children about their HIV status: a  
528 review of available resources, tools, and models for improving and promoting  
529 pediatric disclosure. *AIDS Care*, 2017, 29(8), 1019-1025.  
530 doi:10.1080/09540121.2016.1273471
- 531 6. Vranda, M. N. S., D. K.; Ramakrishna, J. & H. G. Veena. HIV disclosure : Parental  
532 perceptions in disclosing perinatal HIV infected children about their HIV positive  
533 status. *Indian Journal of Psychiatric Social Work*, 2017, 8(2), 3-7.  
534 doi:10.29120/IJPSW.2017.v8.i2.i2.30

## Guiding caregivers through disclosure

- 535 7. Woollett, N., Black., V.; Cluver, L. & H. Brahmhat. Reticence in disclosure of HIV  
536 infection and reasons for bereavement: impact on perinatally infected adolescents'  
537 mental health and understanding of HIV treatment and prevention in Johannesburg,  
538 South Africa. *African Journal of AIDS Research*, 2017, 16(2):175-184.  
539 doi: 10.2989/16085906.2017.1337646. Epub 2017 Jul 17
- 540 8. Choi, Y. N. A cross-sectional study of pediatric HIV disclosure in rural Zimbabwe.  
541 Duke University, USA. 2017, unpublished dissertation. Retrieved from  
542 <http://hdl.handle.net/10161/15313> Accessed 08 September 2018
- 543 9. Montalto, G. J., Sawe., F. K., Miruka, A. *et al.* (2017). Diagnosis disclosure to  
544 adolescents living with HIV in rural Kenya improves antiretroviral therapy adherence  
545 and immunologic outcomes: a retrospective cohort study. *PLoS ONE*, 2017, 12(10),  
546 e0183180.
- 547 10. Dahourou, D., Raynaud, J. P., & Leroy, V. The challenges of timely and safe HIV  
548 disclosure among perinatally HIV-infected adolescents in sub-Saharan Africa. *Curr*  
549 *Opin HIV AIDS*, 2018,13(3), 220-229. doi:10.1097/COH.0000000000000462
- 550 11. Lee, S., Siberry, G. K., Alarcon, J. O. *et al.* Prevalence and Associated  
551 Characteristics of HIV-Infected Children in Latin America Who Know Their HIV  
552 Status. *J Pediatric Infect Dis Soc*, 2018, 7(1), 78-81. doi:10.1093/jpids/pix001
- 553 12. Goga, A. E., Singh, Y.; Singh, M.; *et al.* Enhancing HIV treatment access and  
554 outcomes amongst HIV infected children and adolescents in resource limited  
555 settings. *Maternal Child Health Journal*, 2017, 21, 1-8. doi:10.1007/s10995-016-  
556 2074-1
- 557 13. DeSilva, M. B., Penwill, N., Sabin, L., *et al.* We don't dare to tell her ... we don't know  
558 where to begin: Disclosure experiences and challenges among adolescents living  
559 with HIV and their caregivers in China. *International Journal of Pediatrics and*  
560 *Adolescent Medicine*, 2018, 5(1), 5-12.  
561 doi:<https://doi.org/10.1016/j.ijpam.2017.11.001>

## Guiding caregivers through disclosure

- 562 14. Kranzer, K., Bradley, J.; Musaazi, J.; *et al.* Loss to follow-up among children and  
563 adolescents growing up with HIV infection: age really matters. *Journal of the*  
564 *International AIDS Society*, 2017, 20 (1): 21737.
- 565 15. Thapa, S., Hannes., K.; Buve, A., Bhattarai, S. & C. Mathei. Theorizing the  
566 complexity of HIV disclosure in vulnerable populations: a grounded theory study.  
567 *BMC Public Health*, 2018, 18(162). doi:10.1186/s12889-018-5073-x
- 568 16. South Africa, National Department of Health. Disclosure Guidelines for  
569 Children and Adolescents in the context of HIV, TB and non-  
570 communicable diseases, 2016. Available from:  
571 [https://chivasouthafrica.org/wp-content/uploads/2020/01/1.-HIV-](https://chivasouthafrica.org/wp-content/uploads/2020/01/1.-HIV-disclosure-guideline-for-children-and-adolescent-2016_1-1.pdf)  
572 [disclosure-guideline-for-children-and-adolescent-2016\\_1-1.pdf](https://chivasouthafrica.org/wp-content/uploads/2020/01/1.-HIV-disclosure-guideline-for-children-and-adolescent-2016_1-1.pdf). Accessed  
573 20 July 2018
- 574 17. Kalomo, E. N., Liao, M.; Besthorn, F., Shilunga, A. P. K. & C. Mbapaha. To tell or not  
575 to tell: Dimensions of disclosure to children with HIV in the Zambezi region of  
576 Northern Namibia. *Journal of HIV/AIDS & Social Services*, 2017, 16(3), 250-268.  
577 doi:10.1080/15381501.2017.1341359
- 578 18. Ekstrand ML, Heylen E, Mehta K, Sanjeeva GN & Shet A. Disclosure of HIV status to  
579 infected children in South India: Perspectives of caregivers. *J Trop Pediatrics*, 2018,  
580 64(4): 342-334
- 581 19. Gyamfi, E., Okyere, P.; Enoch, A. & E. Appiah-Brempong. Prevalence of, and  
582 barriers to the disclosure of HIV status to infected children and adolescents in a  
583 district of Ghana. *BMC International Health and Human Rights*, 2017, 17(8).  
584 doi:10.1186/s12914-017-0114-6
- 585 20. Vreeman, R.C., Gramelspacher, A. M., Gisore, P. O., Scanlon M. L. & W.  
586 M. Nyandiko. Disclosure of HIV status to children in resource-limited  
587 settings: a systemic review. *J Int Aids Soc.*, 2013, 16 (1):18466.
- 588 21. Baker, A. N. Bayer, A. M.; Kolevic, L.; Najarro, L.; Viani, R. M. & J. G. Deville. Child,  
589 caregiver, and health care provider perspectives and experiences regarding

## Guiding caregivers through disclosure

- 590 disclosure of HIV status to perinatally infected children in Lima, Peru. *Journal of the*  
591 *International Association of Providers of AIDS Care*, 2018, 17, 1-10.  
592 doi:10.1177/2325957417752257
- 593 22. Beck-Sague, C., Pinzon-Iregui, M. C., Abreu-Perez, R. *et al.* Disclosure of their  
594 status to youth with human immunodeficiency virus infection in the Dominican  
595 Republic: a mixed-methods study. *AIDS and Behavior*, 2015, 19(2), 302-310.  
596 doi:10.1007/s10461-014-0888-7
- 597 23. Finnegan, A., Langhaug, L., Schenk, K. *et al.* The prevalence and process  
598 of pediatric HIV disclosure: A population-based prospective cohort study  
599 in Zimbabwe. *PLoS ONE*, 2019,14(5), e0215659.  
600 doi:10.1371/journal.pone.021565910.5281/zenodo
- 601 24. Hayfron-Benjamin, A., Obiri-Yeboah, D., Ayisi-Addo, S., Siakwa, P. M. & Mupepi, P.  
602 M. HIV diagnosis disclosure to infected children and adolescents; challenges of  
603 family caregivers in the Central Region of Ghana. *BMC Pediatrics*, 2018, 18, 365.  
604 doi:10.1186/s12887-018-1330-5
- 605 25. van Elsland SL, Peters RP, Grobbelaar C, et al. Disclosure of human  
606 immunodeficiency virus status to children in South Africa: A  
607 comprehensive analysis. *South Afr J HIV Med.* 2019;20(1):1-10.
- 608 26. Wiener, L., Mellins, C. A., Marhefka, S. & Battles, H. B. Disclosure of an HIV  
609 diagnosis to Children: History, Current Research, and Future Directions. *J Dev*  
610 *Behav Pediatr.*, 2007, 28(2), 155–166.
- 611 27. Thyer, B. A., & Myers, L. L. Social Learning Theory. *Journal of Human Behavior in*  
612 *the Social Environment*, 1998, 1(1), 33-52. doi:10.1300/J137v01n01\_03
- 613 28. Evangeli, M. & Kagee, A. A model of caregiver paediatric HIV disclosure decision-  
614 making. *Psychol Health Med*, 2016, 21(3), 338-353.  
615 doi:10.1080/13548506.2015.1058959
- 616 29. Armistead, L. G., N.; Schulte, M.; Marelich, W.; LeCroix, R. & D. A. Murphy. Does  
617 Maternal HIV Disclosure Self-Efficacy Enhance Parent– Child Relationships and

## Guiding caregivers through disclosure

- 618 Child Adjustment? *AIDS and Behavior*, 2018, 22(12), 3807–3814.  
619 doi:10.1007/s10461-018-2042-4
- 620 30. Rochat, T. J., Stein, A., Cortina-Borja, M., Tanser, F. & Bland, R. M. The Amagugu  
621 Intervention for Disclosure of maternal HIV to uninfected primary school-aged  
622 children in South Africa: a randomised controlled trial. *Lancet HIV*, 2017, 4(12):e566-  
623 576.
- 624 31. Bhana, A., Mellins, C. A., Petersen, I., *et al.* The VUKA family program:  
625 piloting a family-based psychosocial intervention to promote health and  
626 mental health among HIV infected early adolescents in South Africa. *AIDS*  
627 *Care*, 2014, 26(1):1-11.
- 628 32. Buckley, J., Otwombe, K., Joyce, C., *et al.* Impact of Disclosure over Time on the  
629 Emotional Well-Being of Children with Perinatally Acquired HIV Infection in South  
630 Africa. *Journal of Developmental & Behavioral Pediatrics*. Publish Ahead of Print.  
631 2021. DOI: 10.1097/DPB.0000000000001008
- 632 33. Vujovic, M. & Meyersfeld S. Mini Flipster disclosure tool for adolescents  
633 ages 12 and up. Johannesburg: Right to Care; 2016, 1–47.
- 634 34. Clayton, J. V. A. Pediatric Disclosure Booklet 1: How to Keep Healthy. AIDSTAR-  
635 One, USA: USAID & PEPFAR. 2012a
- 636 35. Clayton, J. V. A. Pediatric Disclosure Booklet 2: Knowing About Myself. AIDSTAR-  
637 One. Project , USA: USAID & PEPFAR. 2012b
- 638 36. Clayton, J. V. A. Pediatric Disclosure Booklet 3: Living a Life of Health. AIDSTAR-  
639 One, USA: USAID & PEPFAR. 2012c
- 640 37. Hennink, M., Hutter, I. & Bailey, A. *Qualitative Research Methods*. London: Sage  
641 Publications, 2011.
- 642 38. Erlingsson, C., & Brysiewicz, P. A hands-on guide to doing content analysis. *Afr J*  
643 *Emerg Med*, 2017, 7(3), 93-99. doi:10.1016/j.afjem.2017.08.001

## Guiding caregivers through disclosure

- 644 39. Das, A., Detels, R., Javanbakht, M., & Panda, S. Issues around childhood disclosure  
645 of HIV status - findings from a qualitative study in West Bengal, India. *Child Care*  
646 *Health Dev*, 2016, 42(4), 553-564. doi:10.1111/cch.12338
- 647 40. Mumburi, L. P., Hamel, B. C., Philemon, R. N., Kapanda, G. N., & Msuya, L. J.  
648 Factors associated with HIV-status disclosure to HIV-infected children receiving care  
649 at Kilimanjaro Christian Medical Centre in Moshi, Tanzania. *The Pan African Medical*  
650 *Journal*, 2014, 18(50). doi:10.11604/pamj.2014.18.50.2307
- 651 41. Kiwanuka, J., Mulogo, E., & Haberer, J. E. Caregiver Perceptions and Motivation for  
652 Disclosing or Concealing the Diagnosis of HIV Infection to Children Receiving HIV  
653 Care in Mbarara, Uganda: A Qualitative Study. *PLoS ONE*, 2014, 9(3).  
654 doi:10.1371/journal.pone.0093276
- 655 42. Madiba, S. The Impact of Fear, Secrecy, and Stigma on Parental Disclosure of HIV  
656 Status to Children: A Qualitative Exploration with HIV Positive Parents Attending an  
657 ART Clinic in South Africa. *Global Journal of Health Science*, 2013, 5(2), 49–61.  
658 doi:10.5539/gjhs.v5n2p49
- 659 43. Oberdorfer, P., Puthanakit, T., Louthrenoo, O., Charmsil, C., Sirisanthana, V. &  
660 Sirisanthana, T. Disclosure of HIV/AIDS diagnosis to HIV-infected children in  
661 Thailand. *Journal of Paediatrics and Child Health*, 2006, 42, 283–288.  
662 doi:10.1111/j.1440-1754.2006.00855.x
- 663 44. Brown, B. J., Oladokun, R.E., Osinusi, K., Ochigbo, S., Adewole, I.F., & Kanki, P.  
664 Disclosure of HIV status to infected children in a Nigerian HIV Care Programme.  
665 *AIDS Care*, 2011, 23(9), 1053-1058.  
666 doi:<https://doi.org/10.1080/09540121.2011.554523>
- 667 45. Sariah, A. R., J.; Somba, M.; Minja, A.; Makuchilo, M.; Tarimo, E.; Urassa, D. & Siril,  
668 H. "Experiences with disclosure of HIV-positive status to the infected child":  
669 Perspectives of healthcare providers in Dar es Salaam, Tanzania. *BMC Public*  
670 *Health*, 2016, 16, 1083. doi:10.1186/s12889-016-3749-7



## Guiding caregivers through disclosure

- 671 46. Mellins, C. A., Brackis-Cott, E., Dolezal, C., Richards, A., Nicholas, S.W. & Abrams,  
672 E.J. Patterns of HIV Status Disclosure to Perinatally HIV-Infected Children and  
673 Subsequent Mental Health Outcomes. *Clinical Child Psychology and Psychiatry*,  
674 2002, 7(1), 101–114.
- 675 47. Britto, C., Mehta, K., Thomas, R., & Shet, A. Prevalence and Correlates of H.I.V  
676 Disclosure Among Children and Adolescents in Low-and Middle-Income Countries: A  
677 systematic Review. *Journal of Developmental & Behavioural Pediatrics*, 2016, 37(6),  
678 496-505. doi: <https://doi.org/10.1097/DBP.0000000000000303>
- 679 48. Domek, G. J. Debunking Common Barriers to Pediatric HIV Disclosure. *Journal of*  
680 *Tropical Pediatrics*, 2010, 56(6), 440-442. doi:10.1093/tropej/fmq013
- 681 49. John-Stewart, G., Wariua., G., Beima-Sofie, K *et al.* Prevalence, Perceptions and  
682 Correlates of Pediatric HIV Disclosure in an HIV Treatment Program in Kenya. *AIDS*  
683 *Care*, 2013, 25(9), 1067–1076. doi:10.1080/09540121.2012.749333
- 684 50. Vreeman, R. C., Nyandiko, W. M., Ayaya, S. O., Walumbe, E. G.,  
685 Marrero, D. G. & Inui, T. S. The perceived impact of disclosure of pediatric  
686 HIV status on pediatric antiretroviral therapy adherence, child well-being,  
687 and social relationships in a resource-limited setting. *AIDS Patient Care*  
688 *STDs*, 2010, 24(10):639-49.
- 689 51. Murphy, D. A., Armistead, L., Marelich, W.D., Payne, D.L. & Herbeck, D.M. Pilot Trial  
690 of a Disclosure Intervention for HIV+ Mothers: The TRACK Program. *Journal of*  
691 *Consulting and Clinical Psychology*, 2011, 79(2), 203–214. doi:10.1037/a0022896
- 692 52. Vaz, L., Corneli, A., Dulyx, J., *et al.* The process of HIV status disclosure to HIV-  
693 positive youth in Kinshasa, Democratic Republic of the Congo. *AIDS Care*, 2008,  
694 20(7):842-885.

## 695 Acknowledgements

#### Guiding caregivers through disclosure

696 We would like to thank Nonhlanhla Mazaleni for the support she provided to study  
697 participants and families and Dr Stacy-Lee Sigamoney for writing the first draft of the  
698 protocol; Right to Care Foundation, Dr Leon Levin and Dr Julia Turner for the informative  
699 workshop on the “Right to Care Mini Flipster Disclosure Tool for Adolescents Ages 12 and  
700 up”; the PHRU clinic staff: Faith Madiehe, Mirriam Mantwa Kunene and Nkata Kekana, for  
701 their care and guidance provided to our patients and caregivers during this study.
